# Supplementary material for: Dietary Sodium and Potassium Intake and Risk of Non-Fatal Cardiovascular Diseases: The Million Veteran Program
Source: MDPI journal article supplement (doi:10.3390/nu14051121), 2022-03-07
Supplement: s1 [file s1]

# Supplementary Materials

## VA Million Veteran Program

### MVP Program Office

- Program Director - Sumitra Muralidhar, Ph.D.  
US Department of Veterans Affairs, 810 Vermont Avenue NW, Washington, DC 20420
- Associate Director, Scientific Programs - Jennifer Moser, Ph.D.  
US Department of Veterans Affairs, 810 Vermont Avenue NW, Washington, DC 20420
- Associate Director, Cohort Management & Public Relations - Jennifer E. Deen, B.S.  
US Department of Veterans Affairs, 810 Vermont Avenue NW, Washington, DC 20420

### MVP Executive Committee

- Co-Chair: J. Michael Gaziano, M.D., M.P.H.  
VA Boston Healthcare System, 150 S. Huntington Avenue, Boston, MA 02130
- Co-Chair: Sumitra Muralidhar, Ph.D.  
US Department of Veterans Affairs, 810 Vermont Avenue NW, Washington, DC 20420
- Jean Beckham, Ph.D.  
Durham VA Medical Center, 508 Fulton Street, Durham, NC 27705
- Kyong-Mi Chang, M.D.  
Philadelphia VA Medical Center, 3900 Woodland Avenue, Philadelphia, PA 19104
- Philip S. Tsao, Ph.D.  
VA Palo Alto Health Care System, 3801 Miranda Avenue, Palo Alto, CA 94304
- Shih-Wen Luoh, M.D., Ph.D.  
VA Portland Health Care System, 3710 SW US Veterans Hospital Rd, Portland, OR 97239  
US Department of Veterans Affairs, 810 Vermont Avenue NW, Washington, DC 20420
- Juan P. Casas, M.D., Ph.D., Ex-Officio  
VA Boston Healthcare System, 150 S. Huntington Avenue, Boston, MA 02130

### MVP Principal Investigators

- J. Michael Gaziano, M.D., M.P.H.  
VA Boston Healthcare System, 150 S. Huntington Avenue, Boston, MA 02130
- Philip S. Tsao, Ph.D.  
VA Palo Alto Health Care System, 3801 Miranda Avenue, Palo Alto, CA 94304

### MVP Operations

- MVP Executive Director – Juan P. Casas, M.D., Ph.D.  
VA Boston Healthcare System, 150 S. Huntington Avenue, Boston, MA 02130
- Director of Regulatory Affairs – Lori Churby, B.S.  
VA Palo Alto Health Care System, 3801 Miranda Avenue, Palo Alto, CA 94304
- MVP Cohort Management Director – Stacey B. Whitbourne, Ph.D.  
VA Boston Healthcare System, 150 S. Huntington Avenue, Boston, MA 02130
- MVP Recruitment/Enrollment Director - Jessica V. Brewer, M.P.H.  
VA Boston Healthcare System, 150 S. Huntington Avenue, Boston, MA 02130
- Director, VA Central Biorepository, Boston – Mary T. Brophy M.D., M.P.H.  
VA Boston Healthcare System, 150 S. Huntington Avenue, Boston, MA 02130
- Executive Director for MVP Biorepositories - Luis E. Selva, Ph.D.  
VA Boston Healthcare System, 150 S. Huntington Avenue, Boston, MA 02130
- MVP Informatics, Boston – Shahpoor (Alex) Shayan, M.S.  
VA Boston Healthcare System, 150 S. Huntington Avenue, Boston, MA 02130
- Director, MVP Data Operations/Analytics, Boston – Kelly Cho, M.P.H., Ph.D.  
VA Boston Healthcare System, 150 S. Huntington Avenue, Boston, MA 02130
- Director, Center for Computational and Data Science (C-DACS) & Genomics Core – Saiju Pyarajan Ph.D.  
VA Boston Healthcare System, 150 S. Huntington Avenue, Boston, MA 02130
- Director, Molecular Data Core – Philip S. Tsao, Ph.D.  
VA Palo Alto Health Care System, 3801 Miranda Avenue, Palo Alto, CA 94304
- Director, Phenomics Data Core – Kelly Cho, M.P.H., Ph.D.

|                                                                                                                                                |    |
|------------------------------------------------------------------------------------------------------------------------------------------------|----|
| VA Boston Healthcare System, 150 S. Huntington Avenue, Boston, MA 02130                                                                        | 53 |
| - Director, VA Informatics and Computing Infrastructure (VINCI) – Scott L. DuVall, Ph.D.                                                       | 54 |
| VA Salt Lake City Health Care System, 500 Foothill Drive, Salt Lake City, UT 84148                                                             | 55 |
| - MVP Coordinating Centers                                                                                                                     | 56 |
| o Cooperative Studies Program Clinical Research Pharmacy Coordinating Center, Albuquerque – Todd Connor, Pharm.D.; Dean P. Argyres, B.S., M.S. | 57 |
| New Mexico VA Health Care System, 1501 San Pedro Drive SE, Albuquerque, NM 87108                                                               | 58 |
| o Genomics Coordinating Center, Palo Alto – Philip S. Tsao, Ph.D.                                                                              | 59 |
| VA Palo Alto Health Care System, 3801 Miranda Avenue, Palo Alto, CA 94304                                                                      | 60 |
| o MVP Boston Coordinating Center, Boston - J. Michael Gaziano, M.D., M.P.H.                                                                    | 61 |
| VA Boston Healthcare System, 150 S. Huntington Avenue, Boston, MA 02130                                                                        | 62 |
| o MVP Information Center, Canandaigua – Brady Stephens, M.S.                                                                                   | 63 |
| Canandaigua VA Medical Center, 400 Fort Hill Avenue, Canandaigua, NY 14424                                                                     | 64 |
|                                                                                                                                                | 65 |

## Current MVP Local Site Investigators

|                                                                                     |     |
|-------------------------------------------------------------------------------------|-----|
| - Atlanta VA Medical Center (Peter Wilson, M.D.)                                    | 66  |
| 1670 Clairmont Road, Decatur, GA 30033                                              | 67  |
| - Bay Pines VA Healthcare System (Rachel McArdle, Ph.D.)                            | 68  |
| 10,000 Bay Pines Blvd Bay Pines, FL 33744                                           | 69  |
| - Birmingham VA Medical Center (Louis Dellitalia, M.D.)                             | 70  |
| 700 S. 19th Street, Birmingham AL 35233                                             | 71  |
| - Central Western Massachusetts Healthcare System (Kristin Mattocks, Ph.D., M.P.H.) | 72  |
| 421 North Main Street, Leeds, MA 01053                                              | 73  |
| - Cincinnati VA Medical Center (John Harley, M.D., Ph.D.)                           | 74  |
| 3200 Vine Street, Cincinnati, OH 45220                                              | 75  |
| - Clement J. Zablocki VA Medical Center (Jeffrey Whittle, M.D., M.P.H.)             | 76  |
| 5000 West National Avenue, Milwaukee, WI 53295                                      | 77  |
| - VA Northeast Ohio Healthcare System (Frank Jacono, M.D.)                          | 78  |
| 10701 East Boulevard, Cleveland, OH 44106                                           | 79  |
| - Durham VA Medical Center (Jean Beckham, Ph.D.)                                    | 80  |
| 508 Fulton Street, Durham, NC 27705                                                 | 81  |
| - Edith Nourse Rogers Memorial Veterans Hospital (John Wells., Ph.D.)               | 82  |
| 200 Springs Road, Bedford, MA 01730                                                 | 83  |
| - Edward Hines, Jr. VA Medical Center (Salvador Gutierrez, M.D.)                    | 84  |
| 5000 South 5th Avenue, Hines, IL 60141                                              | 85  |
| - Veterans Health Care System of the Ozarks (Kathrina Alexander, M.D.)              | 86  |
| 1100 North College Avenue, Fayetteville, AR 72703                                   | 87  |
| - Fargo VA Health Care System (Kimberly Hammer, Ph.D.)                              | 88  |
| 2101 N. Elm, Fargo, ND 58102                                                        | 89  |
| - VA Health Care Upstate New York (James Norton, Ph.D.)                             | 90  |
| 113 Holland Avenue, Albany, NY 12208                                                | 91  |
| - New Mexico VA Health Care System (Gerardo Villareal, M.D.)                        | 92  |
| 1501 San Pedro Drive, S.E. Albuquerque, NM 87108                                    | 93  |
| - VA Boston Healthcare System (Scott Kinlay, M.B.B.S., Ph.D.)                       | 94  |
| 150 S. Huntington Avenue, Boston, MA 02130                                          | 95  |
| - VA Western New York Healthcare System (Junzhe Xu, M.D.)                           | 96  |
| 3495 Bailey Avenue, Buffalo, NY 14215-1199                                          | 97  |
| - Ralph H. Johnson VA Medical Center (Mark Hamner, M.D.)                            | 98  |
| 109 Bee Street, Mental Health Research, Charleston, SC 29401                        | 99  |
| - Columbia VA Health Care System (Roy Mathew, M.D.)                                 | 100 |
| 6439 Garners Ferry Road, Columbia, SC 29209                                         | 101 |
| - VA North Texas Health Care System (Sujata Bhushan, M.D.)                          | 102 |
| 4500 S. Lancaster Road, Dallas, TX 75216                                            | 103 |
| - Hampton VA Medical Center (Pran Iruvanti, D.O., Ph.D.)                            | 104 |
| 100 Emancipation Drive, Hampton, VA 23667                                           | 105 |
| - Richmond VA Medical Center (Michael Godschalk, M.D.)                              | 106 |
| 1201 Broad Rock Blvd., Richmond, VA 23249                                           | 107 |
| - Iowa City VA Health Care System (Zuhair Ballas, M.D.)                             | 108 |
|                                                                                     | 109 |

|                                                                            |     |
|----------------------------------------------------------------------------|-----|
| 601 Highway 6 West, Iowa City, IA 52246-2208                               | 110 |
| - Eastern Oklahoma VA Health Care System (River Smith, Ph.D.)              | 111 |
| 1011 Honor Heights Drive, Muskogee, OK 74401                               | 112 |
| - James A. Haley Veterans' Hospital (Stephen Mastorides, M.D.)             | 113 |
| 13000 Bruce B. Downs Blvd, Tampa, FL 33612                                 | 114 |
| - James H. Quillen VA Medical Center (Jonathan Moorman, M.D., Ph.D.)       | 115 |
| Corner of Lamont & Veterans Way, Mountain Home, TN 37684                   | 116 |
| - John D. Dingell VA Medical Center (Saib Gappy, M.D.)                     | 117 |
| 4646 John R Street, Detroit, MI 48201                                      | 118 |
| - Louisville VA Medical Center (Jon Klein, M.D., Ph.D.)                    | 119 |
| 800 Zorn Avenue, Louisville, KY 40206                                      | 120 |
| - Manchester VA Medical Center (Nora Ratcliffe, M.D.)                      | 121 |
| 718 Smyth Road, Manchester, NH 03104                                       | 122 |
| - Miami VA Health Care System (Ana Palacio, M.D., M.P.H.)                  | 123 |
| 1201 NW 16th Street, 11 GRC, Miami FL 33125                                | 124 |
| - Michael E. DeBakey VA Medical Center (Olaoluwa Okusaga, M.D.)            | 125 |
| 2002 Holcombe Blvd, Houston, TX 77030                                      | 126 |
| - Minneapolis VA Health Care System (Maureen Murdoch, M.D., M.P.H.)        | 127 |
| One Veterans Drive, Minneapolis, MN 55417                                  | 128 |
| - N. FL/S. GA Veterans Health System (Peruvemba Sriram, M.D.)              | 129 |
| 1601 SW Archer Road, Gainesville, FL 32608                                 | 130 |
| - Northport VA Medical Center (Shing Shing Yeh, Ph.D., M.D.)               | 131 |
| 79 Middleville Road, Northport, NY 11768                                   | 132 |
| - Overton Brooks VA Medical Center (Neeraj Tandon, M.D.)                   | 133 |
| 510 East Stoner Ave, Shreveport, LA 71101                                  | 134 |
| - Philadelphia VA Medical Center (Darshana Jhala, M.D.)                    | 135 |
| 3900 Woodland Avenue, Philadelphia, PA 19104                               | 136 |
| - Phoenix VA Health Care System (Samuel Aguayo, M.D.)                      | 137 |
| 650 E. Indian School Road, Phoenix, AZ 85012                               | 138 |
| - Portland VA Medical Center (David Cohen, M.D.)                           | 139 |
| 3710 SW U.S. Veterans Hospital Road, Portland, OR 97239                    | 140 |
| - Providence VA Medical Center (Satish Sharma, M.D.)                       | 141 |
| 830 Chalkstone Avenue, Providence, RI 02908                                | 142 |
| - Richard Roudebush VA Medical Center (Suthat Liangpunsakul, M.D., M.P.H.) | 143 |
| 1481 West 10th Street, Indianapolis, IN 46202                              | 144 |
| - Salem VA Medical Center (Kris Ann Oursler, M.D.)                         | 145 |
| 1970 Roanoke Blvd, Salem, VA 24153                                         | 146 |
| - San Francisco VA Health Care System (Mary Whooley, M.D.)                 | 147 |
| 4150 Clement Street, San Francisco, CA 94121                               | 148 |
| - South Texas Veterans Health Care System (Sunil Ahuja, M.D.)              | 149 |
| 7400 Merton Minter Boulevard, San Antonio, TX 78229                        | 150 |
| - Southeast Louisiana Veterans Health Care System (Joseph Constans, Ph.D.) | 151 |
| 2400 Canal Street, New Orleans, LA 70119                                   | 152 |
| - Southern Arizona VA Health Care System (Paul Meyer, M.D., Ph.D.)         | 153 |
| 3601 S 6th Avenue, Tucson, AZ 85723                                        | 154 |
| - Sioux Falls VA Health Care System (Jennifer Greco, M.D.)                 | 155 |
| 2501 W 22nd Street, Sioux Falls, SD 57105                                  | 156 |
| - St. Louis VA Health Care System (Michael Rauchman, M.D.)                 | 157 |
| 915 North Grand Blvd, St. Louis, MO 63106                                  | 158 |
| - Syracuse VA Medical Center (Richard Servatius, Ph.D.)                    | 159 |
| 800 Irving Avenue, Syracuse, NY 13210                                      | 160 |
| - VA Eastern Kansas Health Care System (Melinda Gaddy, Ph.D.)              | 161 |
| 4101 S 4th Street Trafficway, Leavenworth, KS 66048                        | 162 |
| - VA Greater Los Angeles Health Care System (Agnes Wallbom, M.D., M.S.)    | 163 |
| 11301 Wilshire Blvd, Los Angeles, CA 90073                                 | 164 |
| - VA Long Beach Healthcare System (Timothy Morgan, M.D.)                   | 165 |
| 5901 East 7th Street Long Beach, CA 90822                                  | 166 |
| - VA Maine Healthcare System (Todd Stapley, D.O.)                          | 167 |
| 1 VA Center, Augusta, ME 04330                                             | 168 |

|                                                                                   |     |
|-----------------------------------------------------------------------------------|-----|
| - VA New York Harbor Healthcare System (Peter Liang, M.D., M.P.H.)                | 169 |
| 423 East 23rd Street, New York, NY 10010                                          | 170 |
| - VA Pacific Islands Health Care System (Daryl Fujii, Ph.D.)                      | 171 |
| 459 Patterson Rd, Honolulu, HI 96819                                              | 172 |
| - VA Palo Alto Health Care System (Philip Tsao, Ph.D.)                            | 173 |
| 3801 Miranda Avenue, Palo Alto, CA 94304-1290                                     | 174 |
| - VA Pittsburgh Health Care System (Patrick Strollo, Jr., M.D.)                   | 175 |
| University Drive, Pittsburgh, PA 15240                                            | 176 |
| - VA Puget Sound Health Care System (Edward Boyko, M.D.)                          | 177 |
| 1660 S. Columbian Way, Seattle, WA 98108-1597                                     | 178 |
| - VA Salt Lake City Health Care System (Jessica Walsh, M.D.)                      | 179 |
| 500 Foothill Drive, Salt Lake City, UT 84148                                      | 180 |
| - VA San Diego Healthcare System (Samir Gupta, M.D., M.S.C.S.)                    | 181 |
| 3350 La Jolla Village Drive, San Diego, CA 92161                                  | 182 |
| - VA Sierra Nevada Health Care System (Mostaqul Huq, Pharm.D., Ph.D.)             | 183 |
| 975 Kirman Avenue, Reno, NV 89502                                                 | 184 |
| - VA Southern Nevada Healthcare System (Joseph Fayad, M.D.)                       | 185 |
| 6900 North Pecos Road, North Las Vegas, NV 89086                                  | 186 |
| - VA Tennessee Valley Healthcare System (Adriana Hung, M.D., M.P.H.)              | 187 |
| 1310 24th Avenue, South Nashville, TN 37212                                       | 188 |
| - Washington DC VA Medical Center (Jack Lichy, M.D., Ph.D.)                       | 189 |
| 50 Irving St, Washington, D. C. 20422                                             | 190 |
| - W.G. (Bill) Hefner VA Medical Center (Robin Hurley, M.D.)                       | 191 |
| 1601 Brenner Ave, Salisbury, NC 28144                                             | 192 |
| - White River Junction VA Medical Center (Brooks Robey, M.D.)                     | 193 |
| 163 Veterans Drive, White River Junction, VT 05009                                | 194 |
| - William S. Middleton Memorial Veterans Hospital (Prakash Balasubramanian, M.D.) | 195 |
| 2500 Overlook Terrace, Madison, WI 53705                                          | 196 |
